# Supplementary material for: A multiscale description of molecular adsorption on gold nanoparticles by nonlinear optical spectroscopy
Source: Royal Society of Chemistry journal article supplement (doi:10.1039/c1cp21091b), 2011-11-16
Supplement: c1cp21091b.pdf [file c1cp21091b.pdf]

## Supplementary information on:

# Multiscale description of molecular adsorption on gold nanoparticles by nonlinear optical spectroscopy

by C. Humbert,\* O. Pluchery, E. Lacaze, A. Tadjeddine and B. Busson

### *Density Functional Theory methodology*

All DFT calculations were performed with hybrid functionals B3LYP and PBE0, using the Gaussian 09 package [S1]. Geometries were optimised under a convergence criterion of  $10^{-5}$  atomic units for RMS forces. Basis set 6-311++G(d,p) was used for light atoms (H, C and S). The gold atom was described by the Stuttgart-Dresden effective core potential for 1s-4f electrons and gaussian basis set for the valence electrons (19 valence electrons were considered), to which a f-shell polarization gaussian function was added, following the method described in [S2]. The results were comparable to those obtained with a more complete basis [S3] at lower computational cost. It was checked that additional d-shell and p-shell polarization functions had no major effect on the calculations. The choice of functionals, basis sets and effective core potentials is coherent with the literature for organic molecules and vibrational analysis involving 5d metals [S4]. Vibration modes, infrared and Raman activities were calculated using the standard software procedures. Thiophenol having no electronic transition in the visible range probed by SFG, static Raman polarizability calculations were performed. Tests to compare the results to dynamic polarizability calculations have confirmed that they showed no quantitative improvement on the Raman intensities. In a second step, anharmonicity [S5] was taken into account in order to improve the calculated frequencies through the appropriate option of the Gaussian 09 package. The perturbative anharmonic calculation was limited to the four vibration modes under study. Visualization of geometries and vibration modes was done using the Gabedit software [S6].

The results described in the Main text are displayed in the following tables. Columns outlined in bold contain data used in Table 5 of the Main text. Frequencies are in  $\text{cm}^{-1}$ , IR intensities in  $\text{km.mol}^{-1}$  and Raman scattering activities in  $\text{\AA}^4/\text{amu}$ , where amu stands for atomic mass unit.

B3LYP functional

|                      | Thiophenol planar | Thiophenol perp. | GBT planar       | GBT perp.   |
|----------------------|-------------------|------------------|------------------|-------------|
| SCF (Ha)             | -630.525362       | -630.524332      | -765.711168      | -765.714978 |
| $\Delta E / T_{eq.}$ | 28.03 meV / 52.6K |                  | 103.7 meV / 930K |             |
| Mode 1 (harm.)       | 1014.0482         | 1016.7799        | 1009.2808        | 1015.1127   |
| Anharmonic           | 1005.175          | 1014.652         | 1008.033         | 1003.151    |
| IR                   | 0.5236            | 1.8049           | 1.4339           | 2.2725      |
| Raman                | 46.9893           | 39.1986          | 78.3691          | 75.7779     |
| Mode 2 (harm.)       | 1044.9578         | 1043.2688        | 1043.0395        | 1041.1260   |
| Anharmonic           | 1025.831          | 1026.566         | 1024.926         | 1022.090    |
| IR                   | 12.7688           | 10.8786          | 22.6502          | 2.8881      |
| Raman                | 23.0352           | 16.2642          | 42.8627          | 120.6724    |
| Mode 3 (harm.)       | 1104.2913         | 1093.8982        | 1099.5395        | 1094.0985   |
| Anharmonic           | 1074.639          | 1069.553         | 1072.092         | 1068.632    |
| IR                   | 5.9066            | 4.3843           | 6.3535           | 4.6369      |
| Raman                | 3.7709            | 0.2142           | 0.7001           | 0.0773      |
| Mode 4 (harm.)       | 1111.2678         | 1104.6781        | 1094.2258        | 1089.9396   |
| Anharmonic           | 1091.004          | 1082.637         | 1069.000         | 1063.509    |
| IR                   | 29.5672           | 3.0707           | 27.5052          | 9.1167      |
| Raman                | 16.2758           | 8.7381           | 52.3838          | 386.1574    |

PBE0 functional (frequencies in Table 5 are scaled by 0.992)

|                      | Thiophenol planar | Thiophenol perp. | GBT planar        | GBT perp.   |
|----------------------|-------------------|------------------|-------------------|-------------|
| SCF (Ha)             | -630.082342       | -630.081144      | -765.217762       | -765.220688 |
| $\Delta E / T_{eq.}$ | 32.6 meV / 105.2K |                  | 79.6 meV / 650.8K |             |
| Mode 1 (harm.)       | 1016.2952         | 1018.6013        | 1011.7512         | 1017.4046   |
| Anharmonic           | 1005.600          | 1016.629         | 1010.172          | 1006.018    |
| IR                   | 1.9924            | 3.8418           | 3.6415            | 2.5682      |
| Raman                | 31.5533           | 26.4009          | 51.7138           | 29.4714     |
| Mode 2 (harm.)       | 1056.7111         | 1054.2403        | 1055.7401         | 1052.6066   |
| Anharmonic           | 1037.880          | 1036.616         | 1036.060          | 1033.175    |
| IR                   | 10.5776           | 8.3283           | 18.1043           | 3.4875      |
| Raman                | 31.4486           | 24.6315          | 51.3527           | 106.1931    |
| Mode 3 (harm.)       | 1111.8571         | 1100.5907        | 1106.7817         | 1100.3283   |
| Anharmonic           | 1080.607          | 1076.878         | 1075.303          | 1075.588    |
| IR                   | 4.5650            | 5.4344           | 7.4571            | 5.9249      |
| Raman                | 1.7006            | 0.2329           | 0.1604            | 0.0857      |
| Mode 4 (harm.)       | 1131.7079         | 1124.2699        | 1116.0150         | 1110.6807   |
| Anharmonic           | 1108.536          | 1099.633         | 1092.475          | 1083.754    |
| IR                   | 30.8117           | 2.3554           | 28.8258           | 5.4355      |
| Raman                | 26.1692           | 13.7731          | 68.9464           | 388.4918    |

Comparison of the calculated frequencies (free molecule) without any correction factor

| Mode     | Literature | Harmonic B3LYP | Ratio        | Anharmonic B3LYP | Ratio        | Harmonic PBE0 | Ratio        | Anharmonic PBE0 | Ratio        |
|----------|------------|----------------|--------------|------------------|--------------|---------------|--------------|-----------------|--------------|
| 1        | 1002       | 1014.048       | 0.988        | 1005.175         | 0.997        | 1016.295      | 0.986        | 1005.600        | 0.996        |
| 2        | 1026       | 1044.958       | 0.982        | 1025.831         | 1.000        | 1056.711      | 0.971        | 1037.880        | 0.988        |
| 3        | 1072       | 1104.291       | 0.971        | 1074.639         | 0.998        | 1111.857      | 0.964        | 1080.607        | 0.992        |
| 4        | 1093       | 1111.268       | 0.984        | 1091.004         | 1.002        | 1131.708      | 0.966        | 1108.536        | 0.985        |
| $\sigma$ |            |                | $7.27e^{-3}$ |                  | $2.22e^{-3}$ |               | $9.95e^{-3}$ |                 | $4.79e^{-3}$ |

Taking into account anharmonicity allows to reduce the span of the correction factors and shift it much closer to unity. Ratios are defined by theoretical values over experimental ones and measure the correction factor. All values are in  $\text{cm}^{-1}$ ,  $\sigma$  stands for the standard deviation.

Comparison of the calculated frequencies (GBT) without any correction factor

| Mode     | Literature | Harmonic B3LYP | Ratio               | Anharmonic B3LYP | Ratio               | Harmonic PBE0 | Ratio               | Anharmonic PBE0 | Ratio               |
|----------|------------|----------------|---------------------|------------------|---------------------|---------------|---------------------|-----------------|---------------------|
| 1        | 1000       | 1015.113       | 0.985               | 1003.151         | 0.997               | 1017.405      | 0.983               | 1006.018        | 0.994               |
| 2        | 1025       | 1041.126       | 0.985               | 1022.090         | 1.003               | 1052.607      | 0.974               | 1033.175        | 0.992               |
| 3        | 1065       | 1094.099       | 0.973               | 1068.632         | 0.997               | 1100.328      | 0.968               | 1075.588        | 0.990               |
| 4        | 1075       | 1089.940       | 0.986               | 1063.509         | 1.011               | 1110.681      | 0.968               | 1083.754        | 0.992               |
| $\sigma$ |            |                | $6.18\text{e}^{-3}$ |                  | $6.63\text{e}^{-3}$ |               | $7.09\text{e}^{-3}$ |                 | $1.63\text{e}^{-3}$ |

The same conclusions as above can be drawn, except that B3LYP is unable to account for the correct mode assignment, even with anharmonic correction.

References

[S1] Gaussian 09, Revision A.02, M. J. Frisch, G. W. Trucks, H. B. Schlegel, G. E. Scuseria, M. A. Robb, J. R. Cheeseman, G. Scalmani, V. Barone, B. Mennucci, G. A. Petersson, H. Nakatsuji, M. Caricato, X. Li, H. P. Hratchian, A. F. Izmaylov, J. Bloino, G. Zheng, J. L. Sonnenberg, M. Hada, M. Ehara, K. Toyota, R. Fukuda, J. Hasegawa, M. Ishida, T. Nakajima, Y. Honda, O. Kitao, H. Nakai, T. Vreven, J. A. Montgomery, Jr., J. E. Peralta, F. Ogliaro, M. Bearpark, J. J. Heyd, E. Brothers, K. N. Kudin, V. N. Staroverov, R. Kobayashi, J. Normand, K. Raghavachari, A. Rendell, J. C. Burant, S. S. Iyengar, J. Tomasi, M. Cossi, N. Rega, J. M. Millam, M. Klene, J. E. Knox, J. B. Cross, V. Bakken, C. Adamo, J. Jaramillo, R. Gomperts, R. E. Stratmann, O. Yazyev, A. J. Austin, R. Cammi, C. Pomelli, J. W. Ochterski, R. L. Martin, K. Morokuma, V. G. Zakrzewski, G. A. Voth, P. Salvador, J. J. Dannenberg, S. Dapprich, A. D. Daniels, Ö. Farkas, J. B. Foresman, J. V. Ortiz, J. Cioslowski, and D. J. Fox, Gaussian, Inc., Wallingford CT, 2009.

[S2] M. Branca, V. Alezra, C. Kouklovsky, P. Archirel, Tetrahedron 2008, 64, 1743.

[S3] J. M. L. Martin, A. Sundermann, J. Chem. Phys. 2001 114, 3408.

[S4] P. Carbonniere, I. Ciofini, C. Adamo, C. Pouchan, Chem. Phys. Lett. 2006, 429, 52.

[S5] V. Barone, J. Chem. Phys., 2005, 122, 014108.

[S6] A. R. Allouche, J Comput Chem 2011, 32, 174. Gabedit is a free Graphical User Interface for computational chemistry packages. It is available from <http://gabedit.sourceforge.net/>
